# Supplementary material for: Enrichment of the field emission properties of NiCo2O4 nanostructures by UV/ozone treatment
Source: Royal Society of Chemistry journal article supplement (doi:10.1039/d1ma00032b), 2021-01-01
Supplement: d1ma00032b1.pdf [file d1ma00032b1.pdf]

## Supporting information

### **Enrichment in the field emission properties of NiCo<sub>2</sub>O<sub>4</sub> nanostructures by UV/Ozone treatment**

**Mansi Pathak<sup>1</sup>, Pallavi Mutadak<sup>2</sup>, Pratap Mane<sup>3</sup>, Mahendra A. More<sup>2</sup>, Brahmananda Chakraborty<sup>4,5</sup> \* Dattatray J. Late,<sup>6</sup> \* Chandra Sekhar Rout<sup>1\*</sup>**

<sup>1</sup>Centre for Nano and Material Science, Jain University, Jain global campus, Jakkasandra, Ramanagaram, Bangalore - 562112, India.

<sup>2</sup> Centre for Advanced Studies in Materials Science and Condensed Matter Physics, Department of Physics, Savitribai Phule Pune University, Pune 411007, India

<sup>3</sup>Seismology Division, Bhabha Atomic Research Centre, Trombay, Mumbai-400085, India

<sup>4</sup>High Pressure & Synchrotron Radiation Physics Division, Bhabha Atomic Research Centre, Trombay, Mumbai-400085, India

<sup>5</sup>Homi Bhabha National Institute, Mumbai-400094, India

<sup>6</sup>Centre for Nanoscience & Nanotechnology, Amity University Maharashtra, Mumbai-Pune Expressway, Bhatan, Post – Somathne, Panvel, Maharashtra 410206, India

\*Email: [brahma@barc.gov.in](mailto:brahma@barc.gov.in) (BC); [csROUT@gmail.com](mailto:csROUT@gmail.com), [r.chandrasekhar@jainuniversity.ac.in](mailto:r.chandrasekhar@jainuniversity.ac.in) (CSR); [datta099@gmail.com](mailto:datta099@gmail.com) / [djlate@mum.amity.edu](mailto:djlate@mum.amity.edu) (DJL)

**Figure S1**

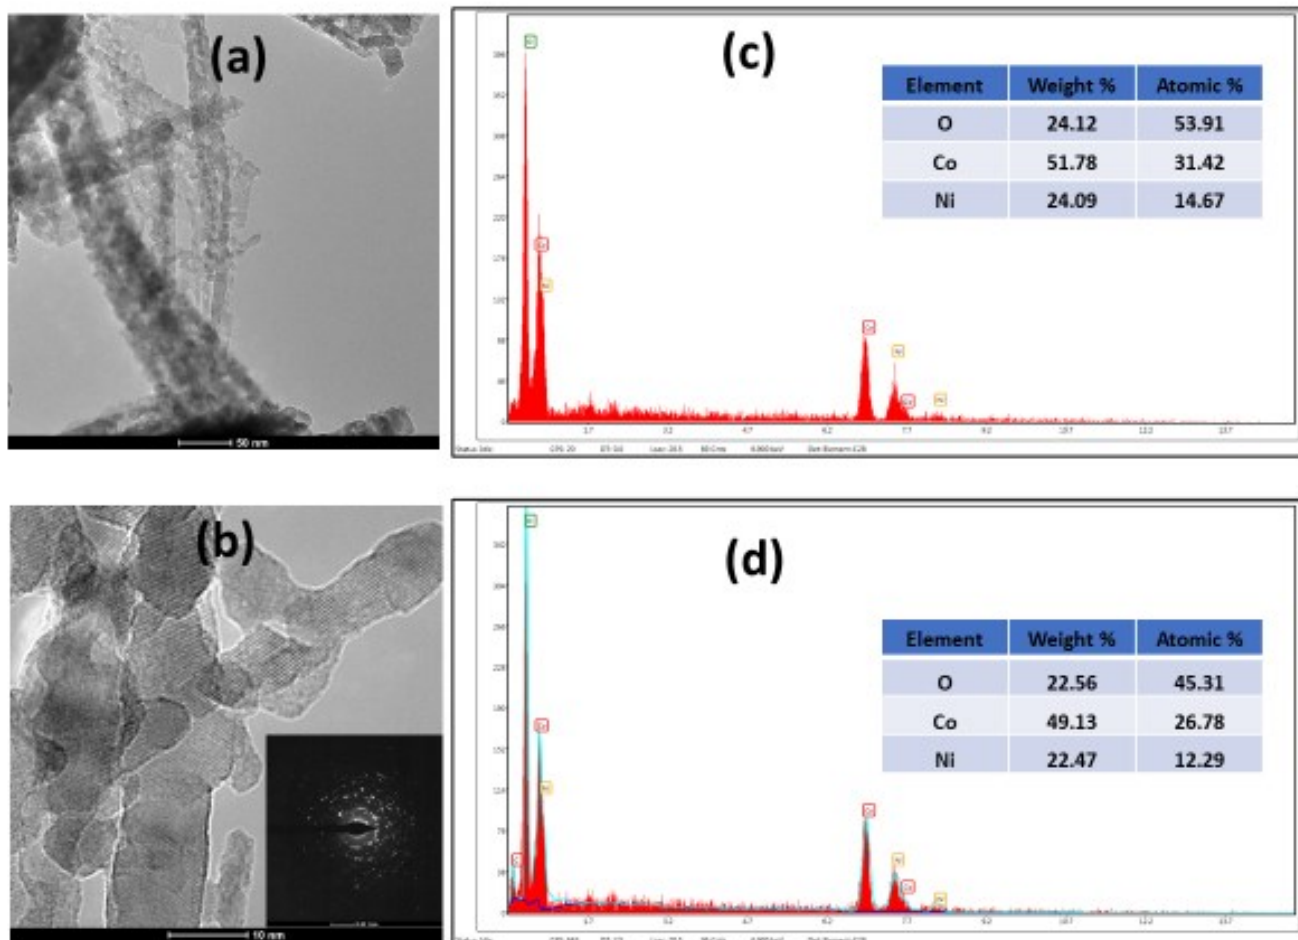

**Figure 1. (a) HRTEM and (b) TEM (inset SAED pattern) images, (c-d) EDS spectra of  $\text{NiCo}_2\text{O}_4$  and  $\text{NiCo}_2\text{O}_4\text{-UVT}$ .**

Figure S2

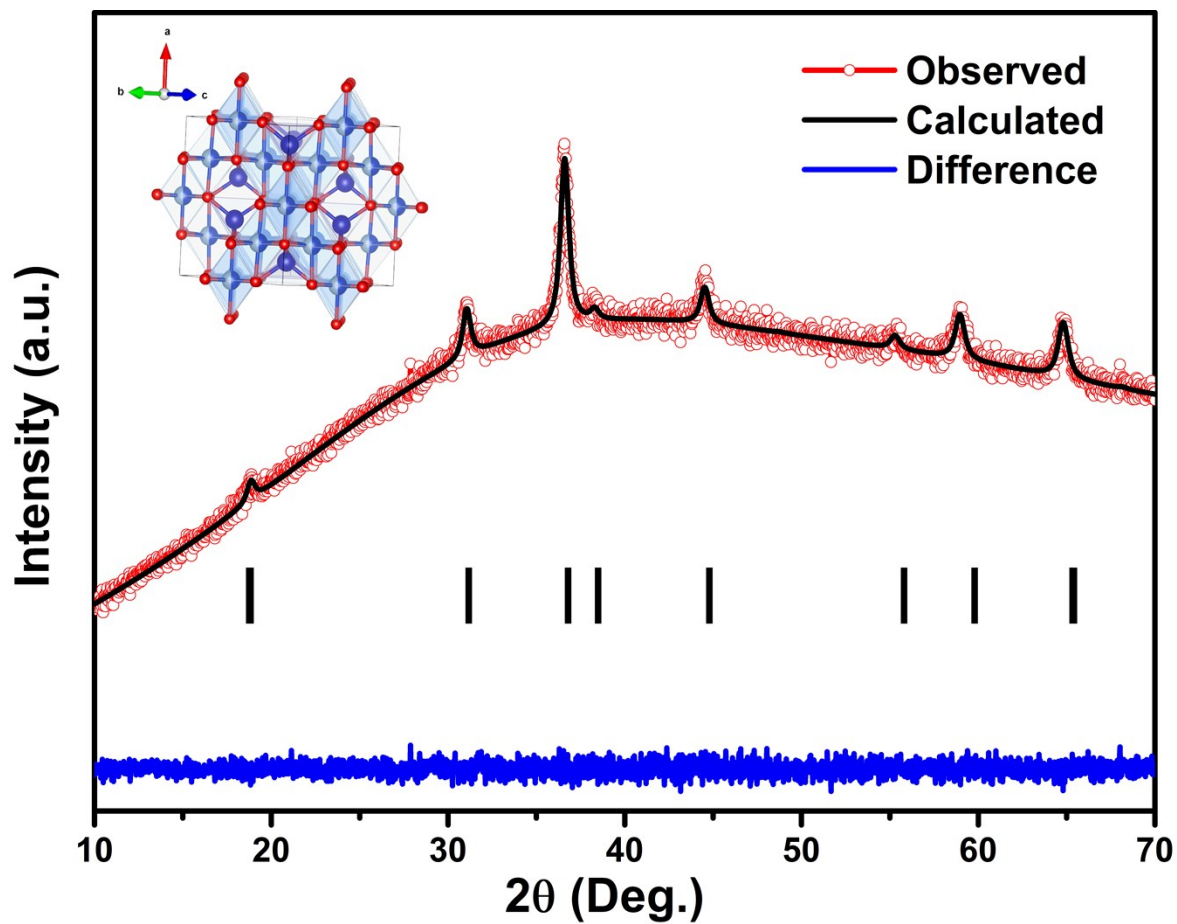

Figure S2. Rietveld refined profile of NiCo<sub>2</sub>O<sub>4</sub>-UVT with fair R-Bragg = 0.190 and goodness of fit =  $\chi^2 = 1.55$ , inset crystallographic structure derived from experimental results

Figure S3

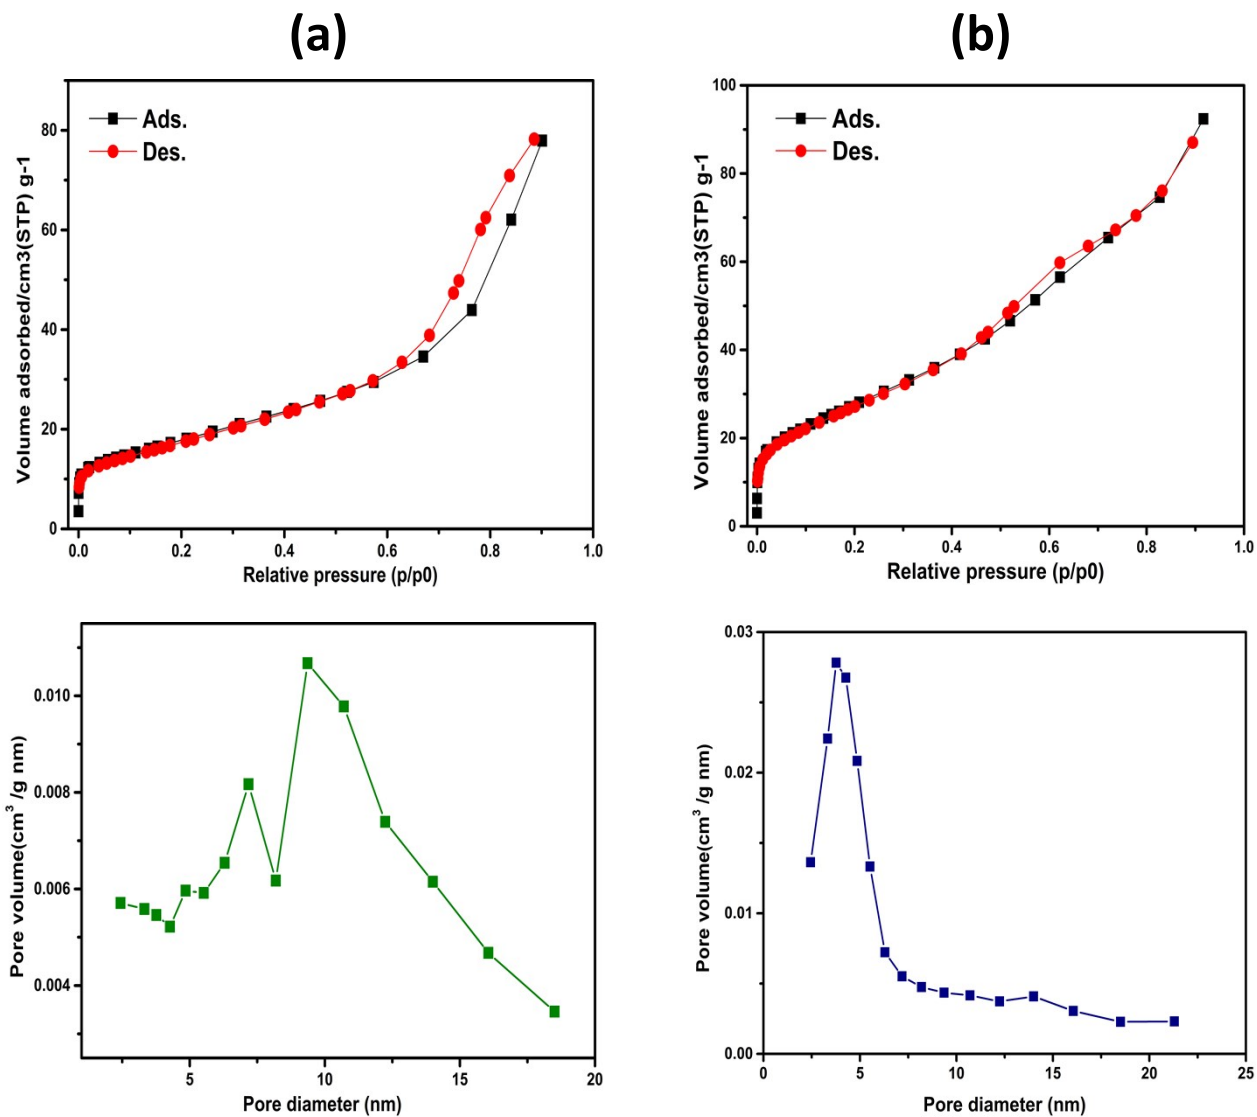

Figure S3. Nitrogen adsorption–desorption isotherms and (b) the corresponding pore size distribution of NiCo<sub>2</sub>O<sub>4</sub>-UVT.

| Sample  | BET surface area (m <sup>2</sup> /g) | BJH pore size (nm) | Pore volume (cm <sup>3</sup> /g) |
|---------|--------------------------------------|--------------------|----------------------------------|
| NCO     | 63.5                                 | 7.58               | 0.12                             |
| NCO-UVT | 96.06                                | 5.95               | 0.14                             |

**Table S1. Peak area ratios corresponding to NiCo<sub>2</sub>O<sub>4</sub> and NiCo<sub>2</sub>O<sub>4</sub>-UVT from the XPS spectra**

| Sample                                 | 2P <sub>1/2</sub> Co <sup>2+</sup> | 2P <sub>1/2</sub> Co <sup>3+</sup> | 2P <sub>3/2</sub> Co <sup>2+</sup> | 2P <sub>3/2</sub> Co <sup>3+</sup> | 2P <sub>1/2</sub> Ni <sup>3+</sup> | 2P <sub>1/2</sub> Ni <sup>2+</sup> | 2P <sub>3/2</sub> Ni <sup>3+</sup> | 2P <sub>3/2</sub> Ni <sup>2+</sup> | O <sub>latt</sub> | O <sub>x</sub> | O-OH |
|----------------------------------------|------------------------------------|------------------------------------|------------------------------------|------------------------------------|------------------------------------|------------------------------------|------------------------------------|------------------------------------|-------------------|----------------|------|
| NiCo <sub>2</sub> O <sub>4</sub>       | 0.56                               | 0.44                               | 0.47                               | 0.52                               | 0.50                               | 0.49                               | 0.48                               | 0.51                               | 0.58              | 0.30           | 0.10 |
| NiCo <sub>2</sub> O <sub>4</sub> - UVT | 0.56                               | 0.44                               | 0.45                               | 0.55                               | 0.46                               | 0.53                               | 0.46                               | 0.53                               | 0.32              | 0.59           | 0.08 |

Figure S4

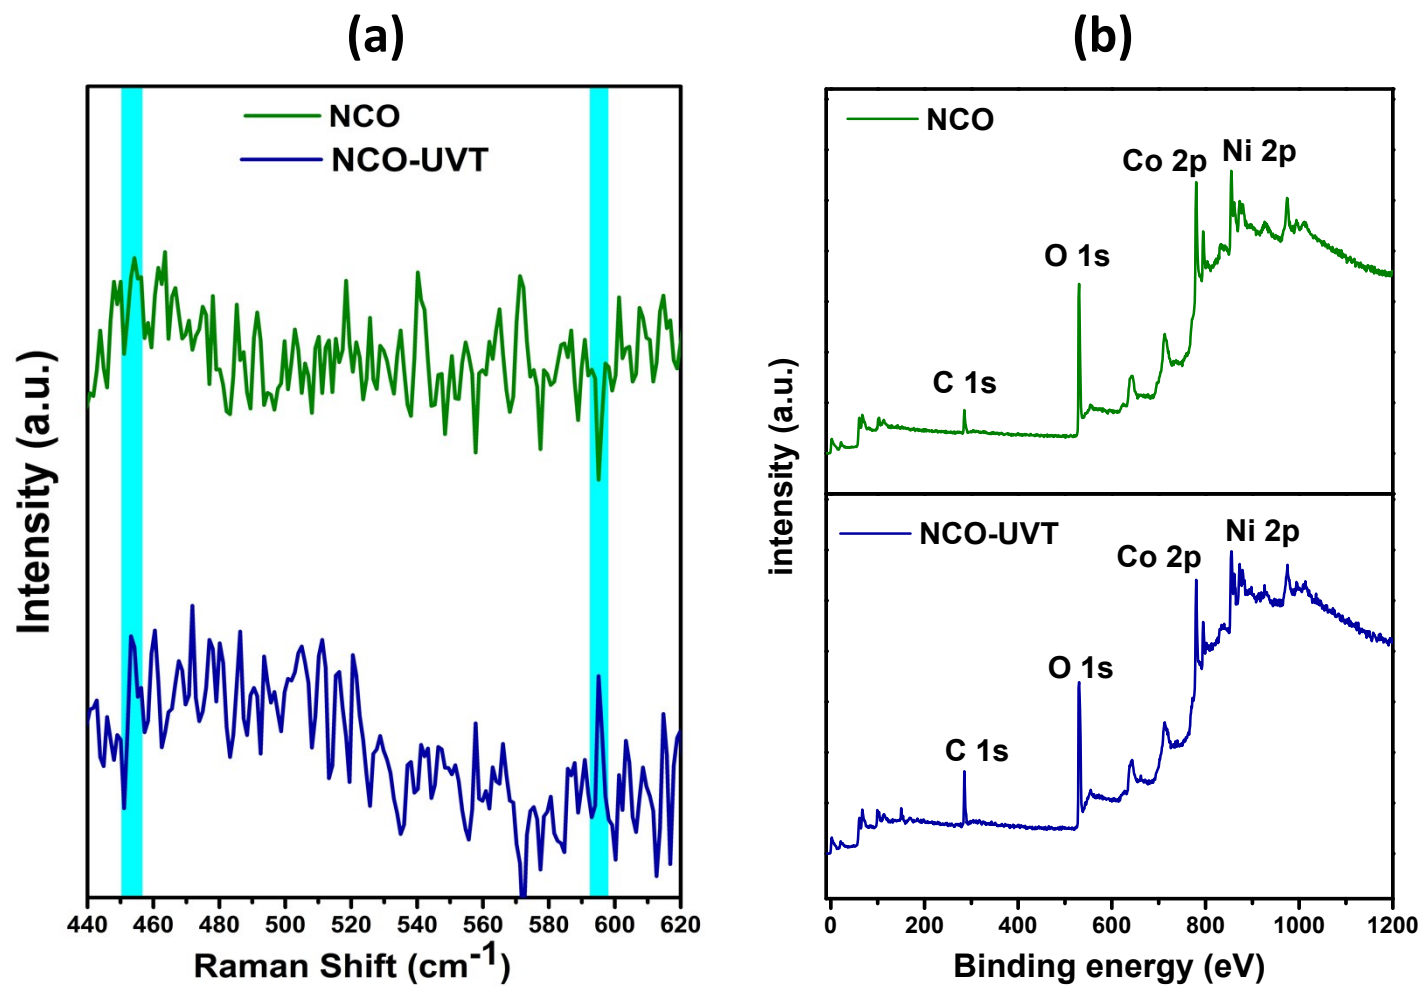

Figure S4. (a) High resolution Raman spectra, (b) XPS survey spectra of NiCo<sub>2</sub>O<sub>4</sub> and NiCo<sub>2</sub>O<sub>4</sub>-UVT
